# Supplementary material for: Study of Polonium (210Po) Activity Concentration in Fruit Wines Derived from Different Locations in Poland
Source: MDPI journal article supplement (doi:10.3390/molecules28010438), 2023-01-03
Supplement: s1 [file s1]

## Supplementary material

# Study of Polonium ( $^{210}\text{Po}$ ) Activity Concentration in Fruit Wines Derived from Different Locations in Poland

Paweł Rudnicki-Velasquez <sup>1</sup>, Alicja Boryło <sup>2</sup>, Marcin Kaczor <sup>2</sup>, Jarosław Wieczorek <sup>2</sup>  
and Jarosława Rutkowska <sup>1,\*</sup>

<sup>1</sup> Institute of Human Nutrition Sciences, Faculty of Human Nutrition, Warsaw University of Life Sciences (WULS-SGGW), Nowoursynowska St. 159c, 02-776 Warsaw, Poland

<sup>2</sup> Faculty of Chemistry, University of Gdańsk, Wita Stwosza Str. 63, 80-308 Gdańsk, Poland

\* Correspondence: jaroslawa\_rutkowska@sggw.edu.pl

**Table S1.** Characteristic of fruit wine samples.

| Sample ID                                      | Type of fruits used for wine production                             | Colour and type of wine |
|------------------------------------------------|---------------------------------------------------------------------|-------------------------|
| <b>Wines from Warmian-Masurian voivodeship</b> |                                                                     |                         |
| W1                                             | multi-fruit (cherry, yeast)                                         | red; semi-dry           |
| W2                                             | multi-fruit                                                         | red; sweet              |
| W3                                             | gean                                                                | red; semi-sweet         |
| W4                                             | cherry                                                              | red; semi-sweet         |
| W5                                             | apple                                                               | white; dry              |
| W6                                             | multi-fruit (cherry, raspberry)                                     | red; semi-sweet         |
| W7                                             | multi-fruit (cherry, raspberry)                                     | red; semi-sweet         |
| W8                                             | multi-fruit (apple, apricot)                                        | white; semi-sweet       |
| W9                                             | multi-fruit (black and red currants)                                | red; dry                |
| W10                                            | multi-fruit (black and red currant, raspberry)                      | red; semi-dry           |
| W11                                            | multi-fruit (cherry, raspberry, black currant)                      | red; sweet              |
| W12                                            | multi-fruit (cherry, raspberry, currant)                            | red; semi-dry           |
| W13                                            | multi-fruit (black and red currant, apple, gooseberry, chokeberry)  | red; semi-sweet         |
| W14                                            | multi-fruit (black and red currants, apple, gooseberry, chokeberry) | red; semi-sweet         |
| W15                                            | apple                                                               | white; semi-sweet       |
| W16                                            | multi-fruit (raspberry, cherry, herbs)                              | red; dry                |
| W17                                            | apple                                                               | white; sweet            |
| W18                                            | multi-fruit (raspberry, cherry, plum)                               | red; dry                |
| <b>Wines from Podlaskie voivodeship</b>        |                                                                     |                         |
| P1                                             | apple                                                               | white; semi-dry         |
| P2                                             | apple                                                               | white; semi-sweet       |
| P3                                             | multi-fruit (chokeberry, gooseberry)                                | white; dry              |
| P4                                             | cherry                                                              | red; semi-sweet         |
| P5                                             | cherry                                                              | red; semi-sweet         |
| P6                                             | cherry                                                              | red; dry                |
| P7                                             | cherry                                                              | red; semi-sweet         |
| P8                                             | black currant                                                       | red; semi-sweet         |
| P9                                             | cherry                                                              | red; dry                |
| P10                                            | multi-fruit (cherry, yeast)                                         | red; semi-dry           |
| P11                                            | raspberry                                                           | red; semi-sweet         |
| P12                                            | multi-fruit (red currant, apple)                                    | red; semi-dry           |
| P13                                            | multi-fruit (apple, pear)                                           | white; sweet            |
| P14                                            | chokeberry                                                          | white; semi-sweet       |
| P15                                            | quince                                                              | white; dry              |
| P16                                            | strawberry                                                          | pink; dry               |
| P17                                            | multi-fruit (raspberry, strawberry, chokeberry)                     | red; semi-dry           |

|                                           |                                             |                   |
|-------------------------------------------|---------------------------------------------|-------------------|
| P18                                       | multi-fruit (apple, gooseberry)             | white; dry        |
| P19                                       | multi-fruit (apple, currant)                | white; sweet      |
| P20                                       | multi-fruit (cherry, bread, yeast)          | red; semi-sweet   |
| <b>Wines from Malopolskie voivodeship</b> |                                             |                   |
| M1                                        | red currant                                 | red; semi-dry     |
| M2                                        | chokeberry                                  | red; semi-dry     |
| M3                                        | black currant                               | red; dry          |
| M4                                        | multi-fruit (pear, apple)                   | white; dry        |
| M5                                        | red currant                                 | red; semi-dry     |
| M6                                        | mint                                        | white; dry        |
| M7                                        | multi-fruit (apple, apricot)                | white; sweet      |
| M8                                        | multi-fruit (black and red currant)         | red; semi-sweet   |
| M9                                        | multi-fruit (plum, raspberry)               | dry; semi-sweet   |
| M10                                       | multi-fruit (cherry, pear, quince)          | red; semi-dry     |
| M11                                       | gooseberry                                  | white; dry        |
| M12                                       | multi-fruit (apricot, quince, red currants) | red; dry          |
| M13                                       | multi-fruit (apricot, gooseberry)           | white; semi-sweet |
| M14                                       | multi-fruit (apricot, pear, quince)         | white; semi-dry   |
| M15                                       | multi-fruit (apricot, cherry)               | red; semi-sweet   |
| M16                                       | multi-fruit (apple, quince)                 | white; semi-sweet |
| M17                                       | multi-fruit (pear, quince, mint)            | red; semi-dry     |
| M18                                       | multi-fruit (apricot, pear)                 | white; semi-sweet |
| M19                                       | multi-fruit (pear, quince, raspberry)       | red; semi-dry     |
| M20                                       | multi-fruit (apple, quince, gooseberry)     | red; semi-dry     |
| M21                                       | multi-fruit (raspberry, cherry, plum)       | red; dry          |
| M22                                       | multi-fruit (raspberry, plum, mint)         | red; dry          |
| M23                                       | multi-fruit (raspberry, mint)               | white; semi-dry   |
| M24                                       | multi-fruit (apricot, gooseberry)           | white; dry        |
| M25                                       | multi-fruit (gooseberry, apricot)           | red; dry          |
| <b>Wines from Lubelskie voivodeship</b>   |                                             |                   |
| L1                                        | cherry                                      | red; semi-dry     |
| L2                                        | apple                                       | white; dry        |
| L3                                        | chokeberry                                  | red; semi-dry     |
| L4                                        | chokeberry                                  | red; semi-dry     |
| L5                                        | cherry                                      | white; dry        |
| L6                                        | pear                                        | white, dry        |
| L7                                        | multi-fruit (cherry, plum)                  | red; semi-dry     |
| L8                                        | pear                                        | pink; sweet       |
| L9                                        | multi-fruit (cherry, gean)                  | white; semi-dry   |
| L10                                       | red currant                                 | red; semi-dry     |
| L11                                       | multi-fruit (currant, plum)                 | red; dry          |
| L12                                       | multi-fruit (strawberry, chokeberry)        | red; semi-dry     |
| L13                                       | multi-fruit (raspberry, currant)            | red; semi-dry     |
| L14                                       | multi-fruit (strawberry, raspberry)         | pink; semi-sweet  |
| L15                                       | multi-fruit (apricot, apple)                | white; semi-sweet |

|     |                                        |                   |
|-----|----------------------------------------|-------------------|
| L16 | multi-fruit (pear, quince, raspberry)  | red; dry          |
| L17 | multi-fruit (apricot, mint)            | white; semi-sweet |
| L18 | multi-fruit (apricot, quince)          | red; dry          |
| L19 | raspberry                              | red; semi-sweet   |
| L20 | multi-fruit (apricot, apple)           | white; semi-sweet |
| L21 | multi-fruit (black currant, raspberry) | red; dry          |
| L22 | raspberry                              | pink; sweet       |
| L23 | multi-fruit (currant, gooseberry)      | white; semi-dry   |
